# Supplementary material for: Age- and Gender-Specific Differences in the Seasonal Distribution of Diabetes Mortality in Shandong, China: A Spatial Analysis
Source: MDPI journal article supplement (doi:10.3390/ijerph192417024), 2022-12-18

## Supplementary Materials:

Table S1. Characteristics of spatial clusters in this study

|                       |        |          |           |            |            |             |              |            |
|-----------------------|--------|----------|-----------|------------|------------|-------------|--------------|------------|
| Total                 |        |          |           |            |            |             |              |            |
| CLUSTER               | LOC_ID | LATITUDE | LONGITUDE | RADIUS     | NUMBER_LOC | P_VALUE     | RR           | POPULATION |
| 1                     | 370687 | 36.8587  | 121.103   | 156.432861 | 27         | 1.721E-14   | 1.579970545  | 2800000    |
| 2                     | 371402 | 37.4417  | 116.378   | 230.52712  | 68         | 4.88057E-10 | 0.71059216   | 6800000    |
| Men                   |        |          |           |            |            |             |              |            |
| CLUSTER               | LOC_ID | LATITUDE | LONGITUDE | RADIUS     | NUMBER_LOC | P_VALUE     | RR           | POPULATION |
| 1                     | 370686 | 37.309   | 120.892   | 145.244446 | 24         | 1.05069E-07 | 1.623048327  | 2500000    |
| 2                     | 370124 | 37.3219  | 117.2     | 195.219446 | 67         | 0.014       | 0.765870017  | 6700000    |
| Women                 |        |          |           |            |            |             |              |            |
| CLUSTER               | LOC_ID | LATITUDE | LONGITUDE | RADIUS     | NUMBER_LOC | P_VALUE     | RR           | POPULATION |
| 1                     | 370686 | 37.309   | 120.892   | 145.244446 | 24         | 1E-17       | 1.7881643836 | 2500000    |
| 2                     | 371428 | 37.237   | 116.084   | 227.62974  | 67         | 1.22957E-12 | 0.6422959200 | 6700000    |
| *Women-men            |        |          |           |            |            |             |              |            |
| CLUSTER               | LOC_ID | LATITUDE | LONGITUDE | RADIUS     | NUMBER_LOC | P_VALUE     | RR           | POPULATION |
| 1                     | 370211 | 36.1991  | 120.575   | 267.517344 | 66         | 1E-17       | 2.813391145  | 6700000    |
| 60-75                 |        |          |           |            |            |             |              |            |
| CLUSTER               | LOC_ID | LATITUDE | LONGITUDE | RADIUS     | NUMBER_LOC | P_VALUE     | RR           | POPULATION |
| 1                     | 370522 | 37.1454  | 118.524   | 118.959879 | 33         | 6.15841E-06 | 0.7803030303 | 3300000    |
| 2                     | 370611 | 37.2653  | 121.558   | 77.0645148 | 11         | 8.25898E-05 | 1.3535573532 | 1200000    |
| 75-                   |        |          |           |            |            |             |              |            |
| CLUSTER               | LOC_ID | LATITUDE | LONGITUDE | RADIUS     | NUMBER_LOC | P_VALUE     | RR           | POPULATION |
| 1                     | 370686 | 37.309   | 120.892   | 145.244446 | 24         | 1E-17       | 1.72258019   | 2500000    |
| 2                     | 371422 | 37.6801  | 116.806   | 234.063573 | 67         | 1E-17       | 0.651181016  | 6700000    |
| 3                     | 371322 | 34.6485  | 118.315   | 110.68727  | 16         | 0.039       | 1.122627737  | 1600000    |
| Table S1. (continued) |        |          |           |            |            |             |              |            |
| **W-S men             |        |          |           |            |            |             |              |            |
| CLUSTER               | LOC_ID | LATITUDE | LONGITUDE | RADIUS     | NUMBER_LOC | P_VALUE     | RR           | POPULATION |
| 1                     | 371003 | 37.1522  | 122.001   | 186.024148 | 21         | 4.33136E-07 | 0.063580591  | 2200000    |
| 2                     | 371726 | 35.5524  | 115.536   | 246.558443 | 65         | 0.001056712 | 2.245299145  | 6500000    |
| W-S_60-75             |        |          |           |            |            |             |              |            |
| CLUSTER               | LOC_ID | LATITUDE | LONGITUDE | RADIUS     | NUMBER_LOC | P_VALUE     | RR           | POPULATION |
| 1                     | 371522 | 36.5815  | 116.171   | 139.080874 | 42         | 1.43649E-10 | 2.020966596  | 4200000    |
| 2                     | 370214 | 36.4845  | 120.513   | 257.844536 | 64         | 6.58599E-06 | 0.575587287  | 6500000    |
| W-S_75                |        |          |           |            |            |             |              |            |
| CLUSTER               | LOC_ID | LATITUDE | LONGITUDE | RADIUS     | NUMBER_LOC | P_VALUE     | RR           | POPULATION |
| 1                     | 370613 | 37.6558  | 120.836   | 297.654024 | 62         | 1E-17       | 0.361697078  | 6300000    |
| 2                     | 370402 | 34.7996  | 117.347   | 160.609842 | 38         | 1E-17       | 2.535236396  | 3800000    |

\*Women-men: mortality difference between women and men

\*\*W-S: mortality difference between winter and summer

Figure S1. Diabetes mortality of men (A) and women (B) in winter in Shandong province, China, 2014

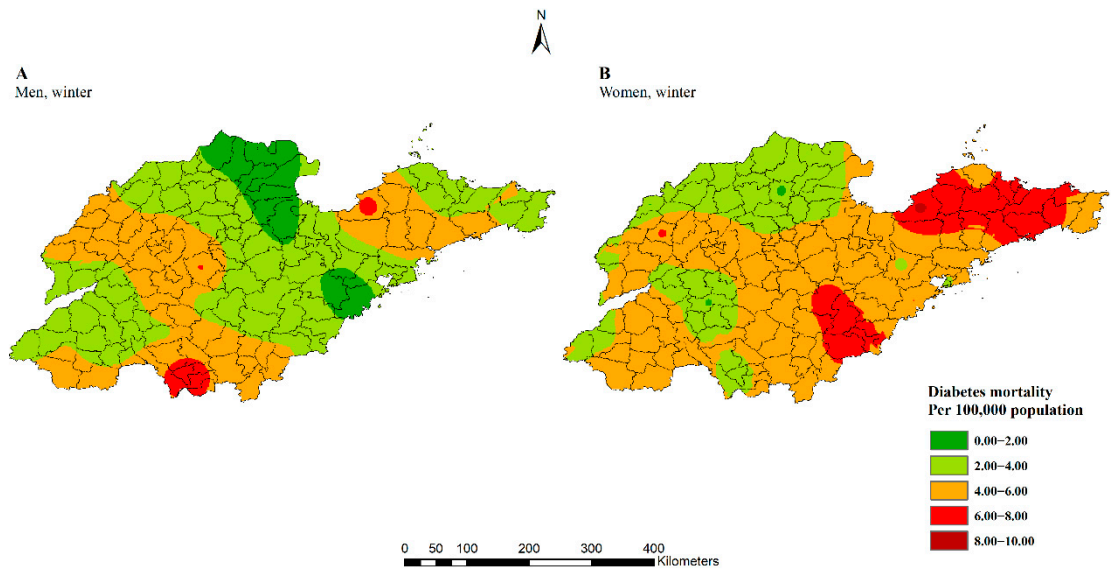

Figure S2. Diabetes mortality difference between winter and summer in men (A) and women (B) groups respectively in Shandong province, China, 2014

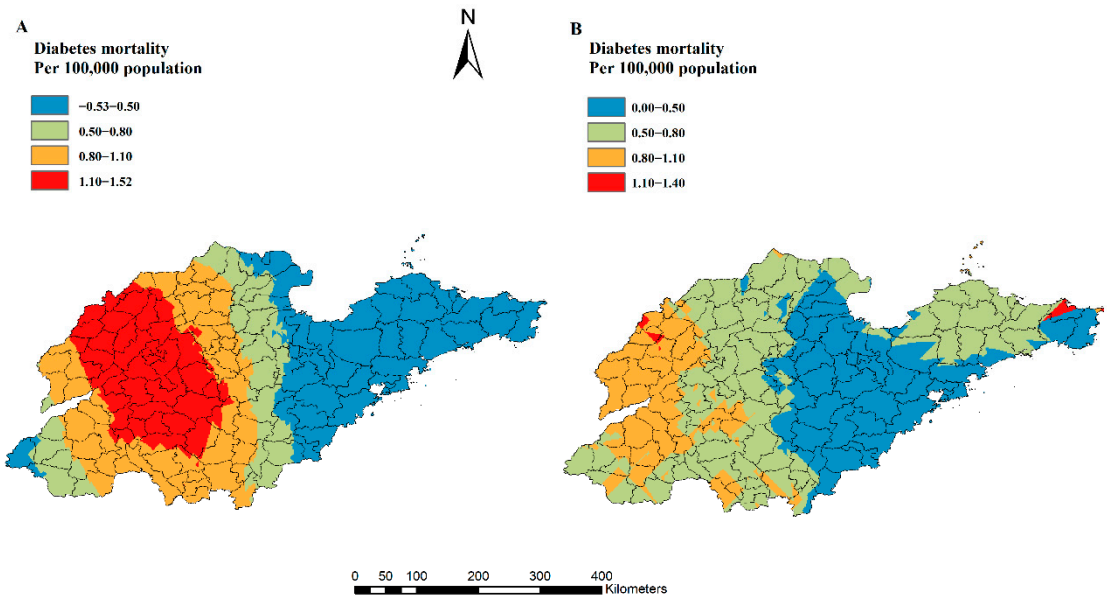

Figure S3. Average monthly diabetes mortality of men and women in Shandong province during 2011 to 2020

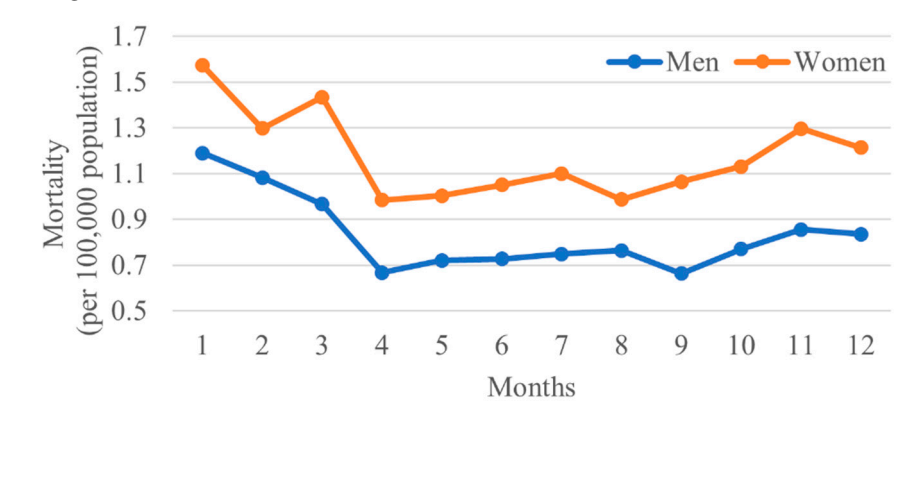

Figure S4. Diabetes mortality in ten surveillance points during 2011 to 2020, in Shandong province

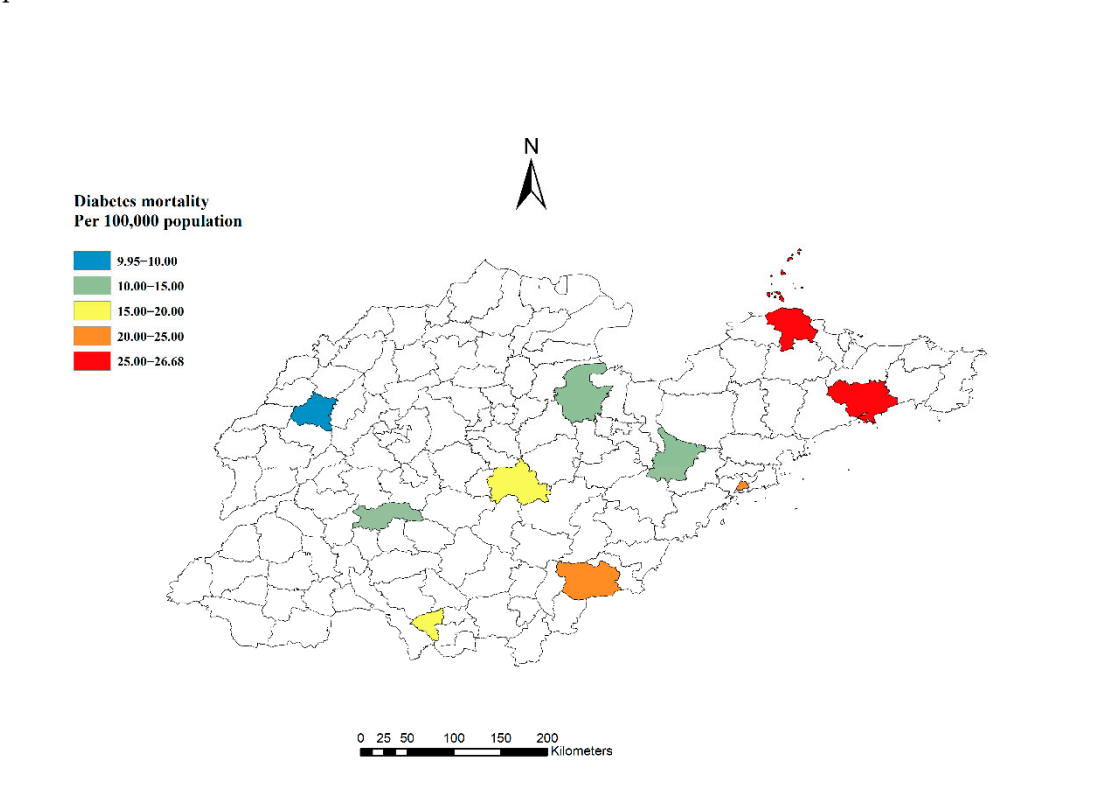

Supplement: s1 [file s1]
